# Supplementary material
Source: publisher figshare collection journal article supplement (https://frontiersin.figshare.com/ndownloader/files/15221495)
Supplement: Supplementary file 1 [file 15221495]

**Table 1. Appendix of Abbreviations**

AlertoxNet - Atlantic Area Network for introduction of Innovative Toxicity Alert Systems

AHAB – Alaska Harmful Algal Bloom

AOAC – Association of Analytical Communities

AOOS – Alaska Ocean Observing System

ASIMUTH – Applied Simulations and Integrated Modelling for the Understanding of Toxic and Harmful algal blooms

ASP – Amnesic Shellfish Poisoning

AUV – Autonomous Underwater Vehicle

BHAB – Benthic Harmful Algal Bloom

BOHAB***–*** Biological Oceanography of Harmful Algal Blooms off the west coast of Ireland

Cal-HABMAP – California Harmful Algal Bloom Monitoring and Alert Program

CariCOOS – Caribbean Coastal Association Observing System

CBD – Convention on Biological Diversity

CDFW – California Department of Fish and Wildlife

CDPH – California Department of Public Health

CeNCOOS - Central and Northern California Ocean Observing System

C-HARM – California Harmful Algae Risk Mapping system

CIGLR – Cooperative Institute for Great Lakes Research

CFP – Ciguatera Fish Poisoning

CMEMS - Copernicus Marine Environmental Monitoring Services

CO-OPS – NOAA Center for Operational Oceanographic Products and Services

CoCliME - Co-development of Climate Services for adaptation to changing Marine Ecosystems

CTX - Ciguatoxin

DA – Domoic Acid

DG – Directorate-General

DSP – Diarrhetic Shellfish Poisoning

DINEOF – Data Interpolating Empirical Orthogonal Functions

EBV - Essential Biodiversity Variable

EBSA – Ecologically or Biologically Significant Area

EC – European Commission

ECOHAB – NOAA Ecology and Oceanography of Harmful Algal Blooms program

ELISA – Enzyme-Linked Immunosorbant Assay

EOV –Essential Oceanographic Variable

EPA – U.S. Environmental Protection Agency

ERDDAP- NOAA Environmental Research Division Data Access Program

ESA – European Space Agency

ESP – Environmental Sample Processor

EU - European Union

EUMETSTAT –European Organisation for the Exploitation of Meteorological Satellites

FAIR – Findable, Accessible, Interoperable, and Reusable

FAN – Floraciones Algales Nocivas

FDA – Federal Department of Agriculture

FWC – Florida Wildlife Commission

G7 – Group of Seven

GEO – Group on Earth Observations

GEO BON – Group on Earth Observations Biodiversity Observation Network

GEOHAB – Global Ecology and Oceanography of Harmful Algal Blooms

GBIF – Global Biodiversity Information Facility

GCOOS - Gulf Coast Ocean Observing System

GLERL – Great Lakes Environmental Research Laboratory

GlobalHAB- Global Harmful Algal Bloom

GLOS – Great Lakes Observing System

GOM – Gulf of Mexico

GOOS - Global Ocean Observing System

HAB – Harmful Algal Bloom

HABBUOY – Harmful Algal Bloom-Buoy

HABES *–* Harmful Algal Blooms Expert System

HABIT – Harmful Algal Bloom species in Thin Layers

HABWATCH – Harmful Algal Bloom Watch

HAEDAT— Harmful Algae Event Database

HFR – High-Frequency Radar

IFCB – Imaging Flow CytoBot

IFREMER – Institut français de recherche pour l'exploitation de la mer

IMO – International Maritime Organization

IOC – U.N. Intergovernmental Oceanographic Commission

IOC HABViet – IOC Harmful Algal Blooms Vietnam

IOC WESTPAC – IOC Subcommission for the Western Pacific

IOOS – United States Integrated Ocean Observing System

IPBES – Intergovernmental Science-Policy Platform on Biodiversity and Ecosystem Services

L’accord RAMOGE – Treaty between the cities of Saint RApheael, MOnaco, and GEnes

LC-MS – Liquid Chromatography–Mass Spectrometry

MBARI – Monterey Bay Aquarium Research Institute

MBON – Marine Biodiversity Observing Network

MERIS – Medium Resolution Imaging Spectrometer

MERHAB – NOAA Monitoring and Event Response for Harmful Algal Blooms program

MIDTAL – Microarrays for the detection of toxic algae

MODIS – Moderate Resolution Imaging Spectroradiometer

NANOOS - Northwest Association of Networked Ocean Observing Systems

NASA – National Aeronautics and Space Administration

NASBA – Nucleic Acid Sequence Based Amplification

NCCOS – National Centers for Coastal Ocean Science

NEMEDA – Network to diminish the effects of the *Dinophysis* in the Aquaculture

NEMO – Northwest Enhanced Moored Observatory

NERACOOS – Northeastern Regional Association of Coastal Ocean Observing Systems

NOAA – National Oceanic and Atmospheric Administration

NOS – National Ocean Service

NVS – NANOOS Data Visualization System

OAR – Oceanic and Atmospheric Research

OBIS – Ocean Biogeographic Information System

OEHHA – California Office of Environmental Health Hazard Assessment

ORHAB – Olympic Region Harmful Algal Blooms

PAN – Proliferation d’Algues Nuisibles

PNW – Pacific Northwest

PSP – Paralytic Shellfish Poisoning

PST – Paralytic Shellfish Toxin

PRIMROSE - Predicting Risk and Impact of Harmful Events on the Aquaculture Sector

RBC – Receptor Binding Assay

RNA – Ribonucleic Acid

ROMS – Regional Ocean Modeling System

SaWS – *Sargassum* Watch System

SCCOOS - Southern California Coastal Ocean Observing System

SDG – Sustainable Development Goal

SCOR – Scientific Committee on Oceanic Research

SEAS – *Sargassum* Early Advisory System

SEATOR – Southeast Alaska Tribal Ocean Research

UME – unusual mortality event

UNEP – United Nations Environment Program

U.S. – United States

USGS – United States Geological Survey
